# Supplementary material for: 3β-Hydroxy-12-oleanen-27-oic Acid Exerts an Antiproliferative Effect on Human Colon Carcinoma HCT116 Cells via Targeting FDFT1
Source: MDPI journal article supplement (doi:10.3390/ijms241915020), 2023-10-09
Supplement: s1 [file s1]

# Supplementary Materials

## **3 $\beta$ -Hydroxy-12-oleanen-27-oic acid exerts the antiproliferative effect on human colon carcinoma HCT116 cells via targeting FDFT1**

**Jue Tu <sup>1,2</sup>, Xiang Meng<sup>1</sup>, Juanjuan Wang<sup>1</sup>, Ziyi Han<sup>1</sup>, Zuoting Yu<sup>1</sup>, Hongxiang Sun<sup>1,\*</sup>**

<sup>1</sup> College of Animal Sciences, Zhejiang University, Hangzhou 310058, China; zheyu1114@126.com (J.T.); 1154026924@qq.com (X.M.); wjuanjuanhaohao@126.com (J.J.W.); 15222671162@163.com (Z.Y. H.); 18258972770@163.com (Z.T.Y.); sunhx@zju.edu.cn (H.X.S.)

<sup>2</sup> *Laboratory Animal Research Center, Academy of Chinese Medical Sciences, Zhejiang Chinese Medical University, Hangzhou, 310053, China; zheyu1114@126.com (J.T.)*

\* Correspondence: sunhx@zju.edu.cn; Tel.: +86-570-8898-2091

## Supplementary Figures

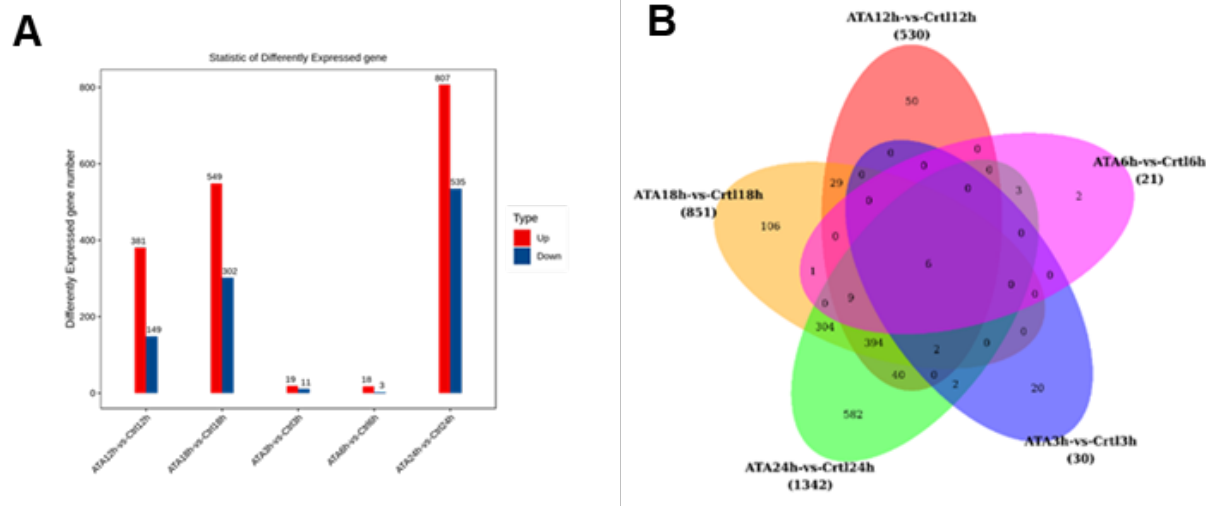

**Figure S1.** The numbers of up-regulated and down-regulated genes in HCT16 cells induced by ATA at indicated time points.

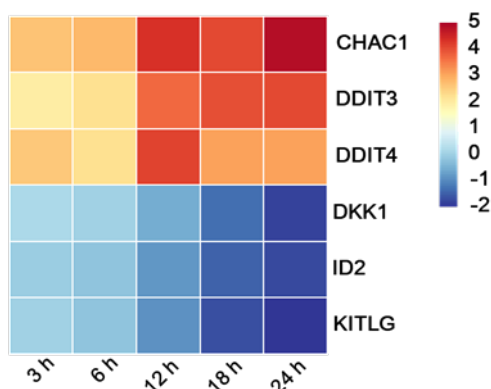

**Figure S2.** Expression heatmap of the validated genes.

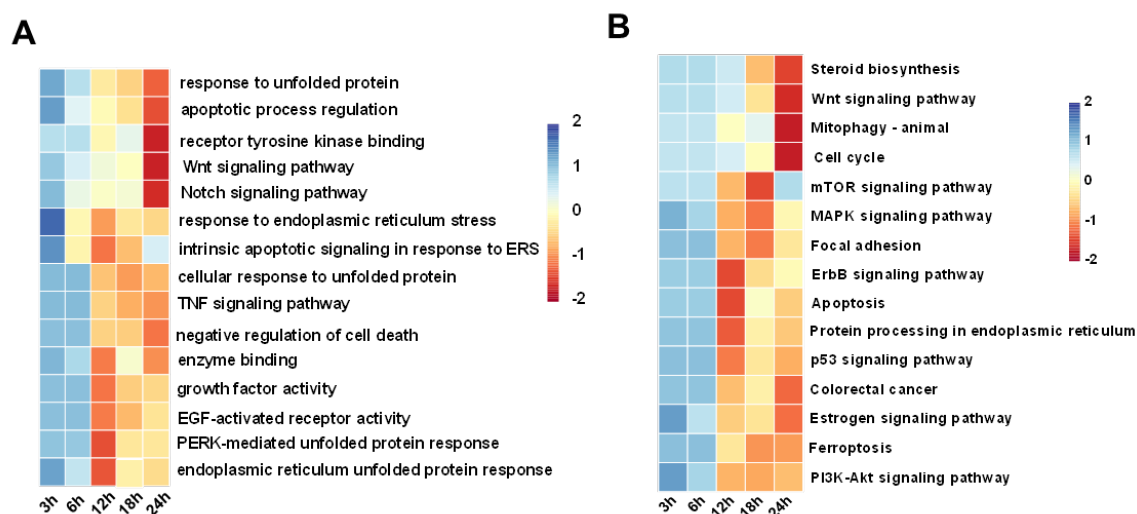

**Figure S3.** Heatmap of GO function (A) and KEGG pathway (B) enrichment of DEGs in HCT116 cells treated with ATA for different times.

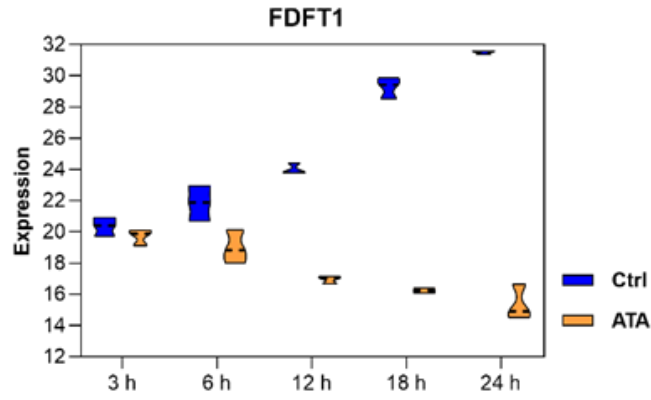

**Figure S4.** The expression levels of FDFT1 in HCT116 cells treated with ATA by RNA-Seq.

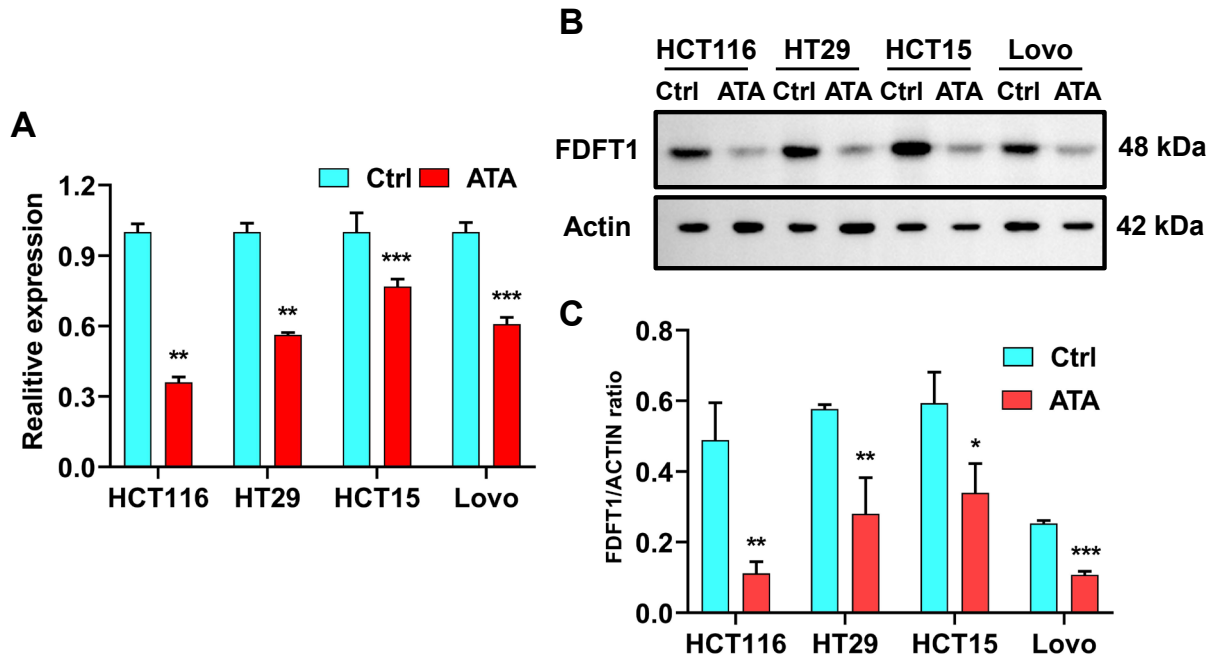

**Figure S5.** The gene and protein expression of FDFT1 in a diversity of CRC cell lines treated with ATA. (A) The gene expression of FDFT1 in HCT116, HT29, HCT15 and Lovo cells treated with ATA (30  $\mu$ M) for 12 h by RT-qPCR assay. (B,C) The protein expression of FDFT1 in CRC cells treated with ATA (30  $\mu$ M) for 24 h by Western blotting. The figure (B) shown was representative of three independent experiments. The data (C) were expressed as means  $\pm$  SD ( $n = 3$ ). \* $P < 0.05$ , \*\* $P < 0.01$ , and \*\*\* $P < 0.001$  vs Ctrl (0  $\mu$ M).

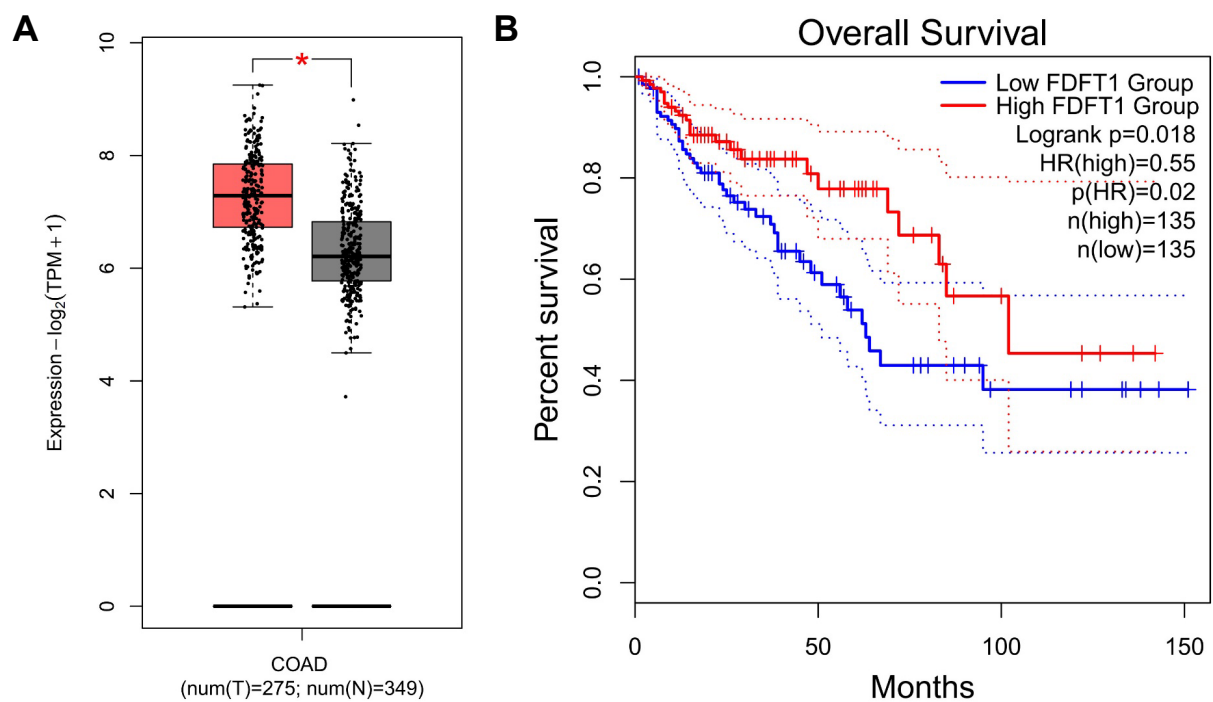

**Figure S6.** Box plots of mRNA expression in colon carcinoma tissues (**A**) and Kaplan-Meier survival plot (**B**) for FDFT1 in a population of colon cancer patients from GEPIA database (<http://gepia.cancer-pku.cn/>) matching TCGA normal and GTEx data. T: tumor; N: normal. The data are expressed as means  $\pm$  SD. \* $P < 0.05$  vs Normal.

**Table S1.** The in vitro cytotoxic effect of ATA and analogue compounds on kinds of human cancer and normal cell lines.

| No. | Cell line       | Tissue information                     | IC <sub>50</sub> (μg/ml) |             |            |            |            |             |           |
|-----|-----------------|----------------------------------------|--------------------------|-------------|------------|------------|------------|-------------|-----------|
|     |                 |                                        | Cisplatin                | Oxaliplatin | β-Elemene  | 23-HA      | ATA        | OA          | UA        |
| 1   | J82             | Bladder cancer                         | 0.40±0.19                | 6.47±0.69   | 16.87±0.52 | 13.38±0.35 | 10.59±0.94 | > 100       | 6.26±0.36 |
| 2   | SW1710          | Bladder cancer                         | 5.49±0.26                | 30.53±1.34  | 30.65±2.40 | 14.27±0.20 | 12.13±0.35 | > 100       | 4.42±0.04 |
| 3   | T24             | Bladder cancer                         | 1.47±0.14                | 13.32±1.22  | 27.62±0.88 | 12.33±1.06 | 7.44±2.30  | 65.13±26.14 | 4.62±0.08 |
| 4   | UM-UC-3         | Bladder cancer                         | 0.89±0.31                | 4.61        | 17.72±0.02 | 8.44±1.30  | 4.81±0.75  | > 100       | 5.29±0.54 |
| 5   | MCF-7           | Breast cancer                          | 7.81±2.97                | 1.71±0.05   | 26.05±1.34 | 12.14±3.41 | 6.16±1.28  | 44.38±1.52  | 8.34±1.83 |
| 6   | T47D            | Breast cancer                          | 26.16±9.11               | 18.18±1.77  | 37.79±4.62 | 15.80±2.32 | 13.43±4.93 | > 100       | 5.24±0.11 |
| 7   | DLD-1           | Colon cancer                           | 3.95±0.29                | 3.70±1.16   | 35.40±2.84 | 6.81±0.28  | 4.40±0.91  | 40.84±2.03  | 6.02±0.94 |
| 8   | HCT15           | Colon cancer                           | 5.50±0.14                | 4.12±0.45   | 35.11±0.62 | 4.88±0.47  | 3.91±1.15  | 39.91±2.42  | 5.42±0.30 |
| 9   | HepG2           | Liver cancer                           | 14.92±1.27               | 6.27±1.32   | 37.62±1.10 | 13.84±0.33 | 11.37±0.27 | > 100       | 8.01±2.00 |
| 10  | NCI-H460        | Lung cancer                            | 0.55±0.09                | 0.94±0.03   | 38.98±0.80 | 8.00±0.83  | 4.33±0.07  | 51.13±1.23  | 5.88±0.29 |
| 11  | Caov-3          | Ovary cancer                           | 3.38±0.52                | 24.50±0.54  | 24.03±0.57 | 20.02±2.19 | 12.28±0.81 | > 100       | 5.24±0.35 |
| 12  | LNCap clone FGC | Prostate cancer                        | 4.87±0.15                | 0.25        | 48.48      | 9.55±0.55  | 3.12±0.10  | > 100       | 3.38±0.70 |
| 13  | Caki-1          | Renal cancer                           | 2.49±0.56                | 2.63±0.88   | 32.83±0.59 | 12.96±1.46 | 8.53±0.45  | > 100       | 5.43±0.37 |
| 14  | HUVEC           | Human umbilical vein endothelial cells | 10.99±3.85               | 6.50±1.88   | 14.68±5.10 | 12.35±0.47 | 10.81±0.38 | 20.54±1.46  | 3.67±0.29 |
| 15  | MRC-5           | Lung fibroblast                        | 2.19±1.84                | 1.34        | 17.90±0.71 | 14.20±1.86 | 9.53±0.52  | > 100       | 6.38±2.89 |

**Table S2.** TOP20 hub genes predicted by 8 algorithms in cytoHubba plug-in of Cytoscape.

| <b>MNC</b> | <b>Degree</b> | <b>EPC</b> | <b>BottleNeck</b> | <b>Closeness</b> | <b>Radiality</b> | <b>Betweenness</b> | <b>Stress</b> |
|------------|---------------|------------|-------------------|------------------|------------------|--------------------|---------------|
| TP53       | TP53          | TP53       | TP53              | TP53             | TP53             | TP53               | TP53          |
| VEGFA      | VEGFA         | JUN        | VEGFA             | JUN              | JUN              | JUN                | JUN           |
| JUN        | JUN           | VEGFA      | JUN               | VEGFA            | VEGFA            | HSP90AA1           | HSP90AA1      |
| HSP90AA1   | HSP90AA1      | HSP90AA1   | PRKACB            | HSP90AA1         | HSP90AA1         | VEGFA              | VEGFA         |
| CDH1       | CDH1          | CDH1       | HSP90AA1          | CDH1             | CDH1             | CDH1               | CDH1          |
| CXCL8      | CXCL8         | CXCL8      | TTN               | CXCL8            | FYN              | FYN                | BDNF          |
| BDNF       | BDNF          | MMP9       | MUC4              | MMP9             | MMP9             | BDNF               | CXCL8         |
| HSPA5      | HSPA5         | HSPA5      | NRP1              | FYN              | CXCL8            | PRKACB             | FYN           |
| MMP9       | MMP9          | CCNA2      | HSPA8             | BDNF             | HSPA5            | CXCL8              | PRKACB        |
| FYN        | FYN           | BDNF       | THBS1             | HSPA5            | BDNF             | HSPA8              | HSPA5         |
| HSPA8      | FOXP3         | FOXP3      | PTGS2             | HSPA8            | HSPA8            | HSPA5              | HSPA8         |
| FOXP3      | HSPA8         | PTGS2      | NCAM1             | FOXP3            | PRKACB           | HMOX1              | HMOX1         |
| CCNA2      | CCNA2         | CDKN1A     | SYNE1             | PRKACB           | HMOX1            | THBS1              | MMP9          |
| HMOX1      | PTGS2         | SERPINE1   | ATF4              | PTGS2            | PTGS2            | MMP9               | FOXP3         |
| PTGS2      | HMOX1         | HMOX1      | HMOX1             | HMOX1            | FOXP3            | PTGS2              | THBS1         |
| BMP4       | BMP4          | DDIT3      | CDH1              | CCNA2            | SNCA             | TYMS               | PTGS2         |
| SQSTM1     | TYMS          | ATF3       | MMP9              | SNCA             | SQSTM1           | FOXP3              | CCNA2         |
| DDIT3      | SQSTM1        | HSPA8      | JAK1              | SQSTM1           | CCNA2            | PHGDH              | TYMS          |
| PCNA       | PCNA          | EIF2AK3    | KPNA2             | TNFRSF1A         | EIF2AK3          | FASN               | PHGDH         |
| TYMS       | DDIT3         | PCNA       | FYN               | EIF2AK3          | HSPA1A           | STX1A              | SQSTM1        |

**Table S3.** Key transcriptional factors of hub genes.

| TF     | Description                                                                | P value  | Genes                                 |
|--------|----------------------------------------------------------------------------|----------|---------------------------------------|
| STAT3  | signal transducer and activator of transcription 3                         | 7.30E-11 | PTGS2, MMP9, VEGFA, CDH1, HMOX1, TP53 |
| HDAC1  | histone deacetylase 1                                                      | 2.96E-10 | MMP9, CDH1, PTGS2, TP53, HSPA5        |
| TFAP2A | transcription factor AP-2 alpha                                            | 2.96E-10 | VEGFA, MMP9, PTGS2, HMOX1, CDH1       |
| STAT1  | signal transducer and activator of transcription 1, 91kDa                  | 7.00E-10 | TP53, MMP9, PTGS2, HSP90AA1, HMOX1    |
| AR     | androgen receptor                                                          | 1.18E-09 | HMOX1, CDH1, JUN, PTGS2, VEGFA        |
| KLF4   | Kruppel-like factor 4                                                      | 5.65E-09 | VEGFA, HSPA8, TP53, CDH1              |
| RELA   | v-rel reticuloendotheliosis viral oncogene homolog A                       | 6.76E-09 | MMP9, VEGFA, PTGS2, TP53, CDH1, HMOX1 |
| NFKB1  | nuclear factor of kappa light polypeptide gene enhancer in B-cells 1       | 7.03E-09 | CDH1, VEGFA, MMP9, PTGS2, TP53, HMOX1 |
| JUN    | jun proto-oncogene                                                         | 1.27E-08 | MMP9, PTGS2, JUN, VEGFA, TP53         |
| PPARG  | peroxisome proliferator-activated receptor gamma                           | 4.42E-08 | HMOX1, PTGS2, MMP9, TP53              |
| ESR1   | estrogen receptor 1                                                        | 7.84E-08 | TP53, VEGFA, JUN, CDH1                |
| HMGA1  | high mobility group AT-hook 1                                              | 9.97E-08 | PTGS2, CDH1, TP53                     |
| HDAC3  | histone deacetylase 3                                                      | 2.96E-07 | JUN, VEGFA, CDH1                      |
| HDAC4  | histone deacetylase 4                                                      | 2.96E-07 | VEGFA, PTGS2, JUN                     |
| DNMT1  | DNA (cytosine-5-)-methyltransferase 1                                      | 6.56E-07 | CDH1, VEGFA, TP53                     |
| SMAD3  | SMAD family member 3                                                       | 6.56E-07 | VEGFA, MMP9, JUN                      |
| ATF4   | activating transcription factor 4                                          | 9.55E-07 | PTGS2, HSPA5, VEGFA                   |
| PPARA  | peroxisome proliferator-activated receptor alpha                           | 1.33E-06 | HMOX1, MMP9, PTGS2                    |
| SIRT1  | sirtuin 1                                                                  | 2.51E-06 | CDH1, TP53, MMP9                      |
| ELF4   | E74-like factor 4                                                          | 3.09E-06 | MMP9, TP53                            |
| EP300  | E1A binding protein p300                                                   | 4.02E-06 | VEGFA, PTGS2, MMP9                    |
| FOS    | FBJ murine osteosarcoma viral oncogene homolog                             | 4.24E-06 | MMP9, TP53, PTGS2                     |
| WT1    | Wilms tumor 1                                                              | 4.24E-06 | JUN, VEGFA, CDH1                      |
| FOXQ1  | forkhead box Q1                                                            | 4.63E-06 | VEGFA, CDH1                           |
| HDGF   | hepatoma-derived growth factor                                             | 4.63E-06 | CDH1, VEGFA                           |
| IKBKB  | inhibitor of kappa light polypeptide gene enhancer in B-cells, kinase beta | 4.63E-06 | TP53, MMP9                            |
| KLF8   | Kruppel-like factor 8                                                      | 8.63E-06 | MMP9, CDH1                            |
| MEF2C  | myocyte enhancer factor 2C                                                 | 8.63E-06 | JUN, VEGFA                            |
| ELF3   | E74-like factor 3                                                          | 1.11E-05 | MMP9, PTGS2                           |
| HIPK2  | homeodomain interacting protein kinase 2                                   | 1.11E-05 | TP53, VEGFA                           |
| ETS1   | v-ets erythroblastosis virus E26 oncogene homolog 1 (avian)                | 1.14E-05 | HMOX1, TP53, MMP9                     |
| ABL1   | c-abl oncogene 1                                                           | 1.39E-05 | TP53, JUN                             |
| SPDEF  | SAM pointed domain containing ets transcription factor                     | 1.39E-05 | MMP9, CDH1                            |
| EGR1   | early growth response 1                                                    | 1.57E-05 | VEGFA, TP53, PTGS2                    |
| CREB1  | cAMP responsive element binding protein 1                                  | 1.68E-05 | HMOX1, PTGS2, JUN                     |
| SNAI2  | snail homolog 2                                                            | 2.80E-05 | CDH1, MMP9                            |
| ING4   | inhibitor of growth family, member 4                                       | 3.23E-05 | PTGS2, TP53                           |
| FOXM1  | forkhead box M1                                                            | 4.18E-05 | CDH1, VEGFA                           |

**Table S3.** Key transcriptional factors of hub genes (continued).

| TF     | Description                                                     | P value  | Genes              |
|--------|-----------------------------------------------------------------|----------|--------------------|
| GLI2   | GLI family zinc finger 2                                        | 4.70E-05 | JUN, CDH1          |
| HDAC9  | histone deacetylase 9                                           | 4.70E-05 | TP53, HSPA5        |
| ESR2   | estrogen receptor 2                                             | 5.25E-05 | JUN, VEGFA         |
| XBP1   | X-box binding protein 1                                         | 5.25E-05 | VEGFA, HSPA5       |
| E2F1   | E2F transcription factor 1                                      | 5.54E-05 | TP53, HSPA5, VEGFA |
| ARNT   | aryl hydrocarbon receptor nuclear translocator                  | 5.84E-05 | VEGFA, JUN         |
| KLF6   | Kruppel-like factor 6                                           | 5.84E-05 | CDH1, MMP9         |
| VHL    | von Hippel-Lindau tumor suppressor, E3 ubiquitin protein ligase | 5.84E-05 | TP53, VEGFA        |
| CTNNB1 | catenin, beta 1, 88kDa                                          | 7.09E-05 | PTGS2, JUN         |
| MTA1   | metastasis associated 1                                         | 8.47E-05 | MMP9, CDH1         |
| CREBBP | CREB binding protein                                            | 9.20E-05 | TP53, PTGS2        |
| PARP1  | poly (ADP-ribose) polymerase 1                                  | 9.20E-05 | JUN, CDH1          |
| PGR    | progesterone receptor                                           | 9.20E-05 | PTGS2, VEGFA       |
| TCF4   | transcription factor 4                                          | 9.20E-05 | JUN, VEGFA         |
| HDAC2  | histone deacetylase 2                                           | 0.000    | CDH1, VEGFA        |
| RB1    | retinoblastoma 1                                                | 0.000    | VEGFA, CDH1        |
| ATF2   | activating transcription factor 2                               | 0.000    | PTGS2, JUN         |
| ETS2   | v-ets erythroblastosis virus E26 oncogene homolog 2 (avian)     | 0.000    | TP53, MMP9         |
| EZH2   | enhancer of zeste homolog 2 (Drosophila)                        | 0.000    | CDH1, TP53         |
| RUNX1  | runt-related transcription factor 1                             | 0.000    | VEGFA, JUN         |
| USF2   | upstream transcription factor 2, c-fos interacting              | 0.000    | PTGS2, HMOX1       |
| IRF1   | interferon regulatory factor 1                                  | 0.000    | TP53, MMP9         |
| BRCA1  | breast cancer 1, early onset                                    | 0.000    | HSPA5, VEGFA       |
| USF1   | upstream transcription factor 1                                 | 0.001    | PTGS2, HMOX1       |
| HIF1A  | hypoxia inducible factor 1, alpha subunit                       | 0.001    | VEGFA, CDH1        |
| YY1    | YY1 transcription factor                                        | 0.001    | TP53, HSPA5        |
| MYC    | v-myc myelocytomatosis viral oncogene homolog (avian)           | 0.001    | VEGFA, TP53        |
| SP1    | Sp1 transcription factor                                        | 0.002    | VEGFA, PTGS2, MMP9 |
| TP53   | tumor protein p53                                               | 0.004    | TP53, VEGFA        |



**Table S4.** The predicted targets of 3 $\beta$ -hydroxy-12-oleanen-27-oic acid (ATA), oleanolic acid (OA), and ursolic acid (UA).

| Compound   | Predicted targets                                                                                                                                                                                                                                                                                                                                                                                                                                                                                                                                                                                                                                        |
|------------|----------------------------------------------------------------------------------------------------------------------------------------------------------------------------------------------------------------------------------------------------------------------------------------------------------------------------------------------------------------------------------------------------------------------------------------------------------------------------------------------------------------------------------------------------------------------------------------------------------------------------------------------------------|
| <b>ATA</b> | CD81, PTPN2, PTPN1, HSD11B2, ESR2, NR1H3, CYP19A1, SERPINA6, SHBG, G6PD, CYP51A1, PTPN6, CDC25A, TERT, CES2, PREP, FABP1, HMGCR, CYP17A1, NOS2, SCD, POLB, RORC, PDE4D, PTPRF, PLA2G1B, ACP1, PPARG, HSD11B1, CDC25B, PTPN11, NPC1L1, RORA, PPARA, PTGIR, PTGS2, PTGES, AR, SIGMAR1, PTGS1, AKR1B10, FFAR1, PPARD, ESR1, SLC6A4, CYP2C19, FABP4, FABP3, FABP5, IDO1, SREBF2, CTSD, FAAH, SLC6A3, ADORA3, MAPK3, SRD5A2, BCHE, PTGER2, TOP1, TOP2A, NR3C1, PTGER1, NR3C2, FDFT1, ITGAL, TNF, PTGER3, SLC22A6, PRKCH                                                                                                                                       |
| <b>OA</b>  | POLB, PTPN1, PTPN2, PLA2G1B, CDC25B, AKR1B10, RORC, PTPRF, HSD11B1, ACP1, PDE4D, CD81, PTGES, CES2, PTPN6, NOS2, FABP1, AR, PPARG, PREP, SCD, HSD11B2, PRKCH, PTPN11, FNTA FNTB, TERT, PTGS2, CYP19A1, FABP4, PPARA, PPARD, SERPINA6, SHBG, G6PD, CYP51A1, CDC25A, LTB4R, PTGS1, FABP3, FABP5, ESR2, FAAH, NPC1L1, SIGMAR1, CYP17A1, PTGER2, ADORA3, MAPK3, NR1H3, GPBAR1, NR3C1, SAE1 UBA2, SLC6A4, CYP2C19, TOP1, HMGCR, TLR9, NR1H4, ALOX5, PGR, PTGER4, ALOX5AP, CHRM2, SLC6A2, NR3C2, GRIK1, GRIK2, ESR1, FFAR1, SRD5A2, RORA, BCHE, PTGIR, NR1I3, CES1, MDM2, BACE1, SLC6A3                                                                        |
| <b>UA</b>  | CES2, PTPN1, PTPN2, AKR1B10, PTGES, HSD11B1, PRKCH, HSD11B2, PTPN11, POLB, PLA2G1B, CDC25B, RORC, PTPRF, ACP1, PDE4D, PTPN6, FABP1, PPARG, AR, NR1H3, SCD, PREP, CDC25A, SERPINA6, SHBG, G6PD, CYP51A1, TOP1, CD81, CYP19A1, NPC1L1, SIGMAR1, CYP17A1, FABP4, PPARA, TERT, PPARD, SAE1 UBA2, NOS2, NR3C1, ADORA3, MAPK3, FABP3, FABP5, HMGCR, PTGS1, PGR, FNTA FNTB, FAAH, BCHE, BACE1, RORA, ALOX5, ESR2, PTGER2, TOP2A, IDO1, SLC6A3, PTGER1, CHRM2, SLC6A2, SLC6A4, CYP2C19, FFAR1, SRD5A2, PTGS2, CES1, PTGER4, NR1I3, LTB4R, SREBF2, ESR1, NR1H4, TRPV1, GPBAR1, ALOX5AP, CNR1, ACHE, NR1I2, HSD17B3, SLC22A6, CDC25C, NR3C2, HSD17B2, PTGIR, EPHA2 |

**Table S5.** Primer sequences used for real-time qPCR.

| Gene name | Forward (5'-3')         | Reverse (5'-3')         | Product (bp) |
|-----------|-------------------------|-------------------------|--------------|
| CHAC1     | GAAACGACGGCGACCCTCAAG   | TGCCCCGATGGAAGGTGTCTC   | 147          |
| DDIT3     | GAGAATGAAAGGAAAGTGGCAC  | ATTCACCATTTCGGTCAATCAGA | 120          |
| DDIT4     | GATGCCTAGCCAGTTGGTAAG   | CTAAACAGCCCCTGGATCTTG   | 228          |
| DKK1      | TACCAGACCATTGACAACCTACC | TCCATTTTTGCAGTAATTCCCG  | 189          |
| ID2       | GAAGGTGAGCAAGATGGAAATC  | ACTCAGAAGGGAATTCAGAAGC  | 200          |
| KITLG     | GTGGCAAATCTTCCAAAAGACT  | CCATCTCGCTTATCCAACAATG  | 91           |
| FDFT1     | GGCAGTACCTGACCACTCTC    | TCCTAAAGGTCCCAGCCACA    | 200          |
| GAPDH     | CATGGGTGTGAACCATGAGAA   | GGTCATGAGTCCTTCCACGAT   | 133          |
